# Supplementary material for: Dietary Phosphorus, Its Sources, and Mortality in Adults on Haemodialysis: The DIET-HD Study
Source: MDPI journal article supplement (doi:10.3390/nu14194064), 2022-09-30
Supplement: s1 [file s1]

# Dietary Phosphorus, Its Sources, and Mortality in Adults on Haemodialysis: The DIET-HD Study

## Supplementary Materials

### Table of Content

|                                                                                                                                 |                              |
|---------------------------------------------------------------------------------------------------------------------------------|------------------------------|
| Supplementary Figure S1. Flowchart.....                                                                                         | Error! Bookmark not defined. |
| Supplementary Table S1. Food items in each source-based phosphorus .....                                                        | 3                            |
| Supplementary Table S2. Association between total daily phosphorus intake and mortality .....                                   | 5                            |
| Supplementary Table S3. Association between proportion of phosphorus intake from plant sources and mortality.....               | 7                            |
| Supplementary Table S4. Association between proportion of phosphorus intake from animal sources and mortality.....              | 9                            |
| Supplementary Table S5. Association between proportion of phosphorus intake from other sources and mortality.....               | 11                           |
| Supplementary Item S1. Variables and methods used in the multiple imputation.....                                               | 13                           |
| Supplementary Item S2. List of clinicians and health care professionals at the participating centers in the DIET-HD Study ..... | 14                           |

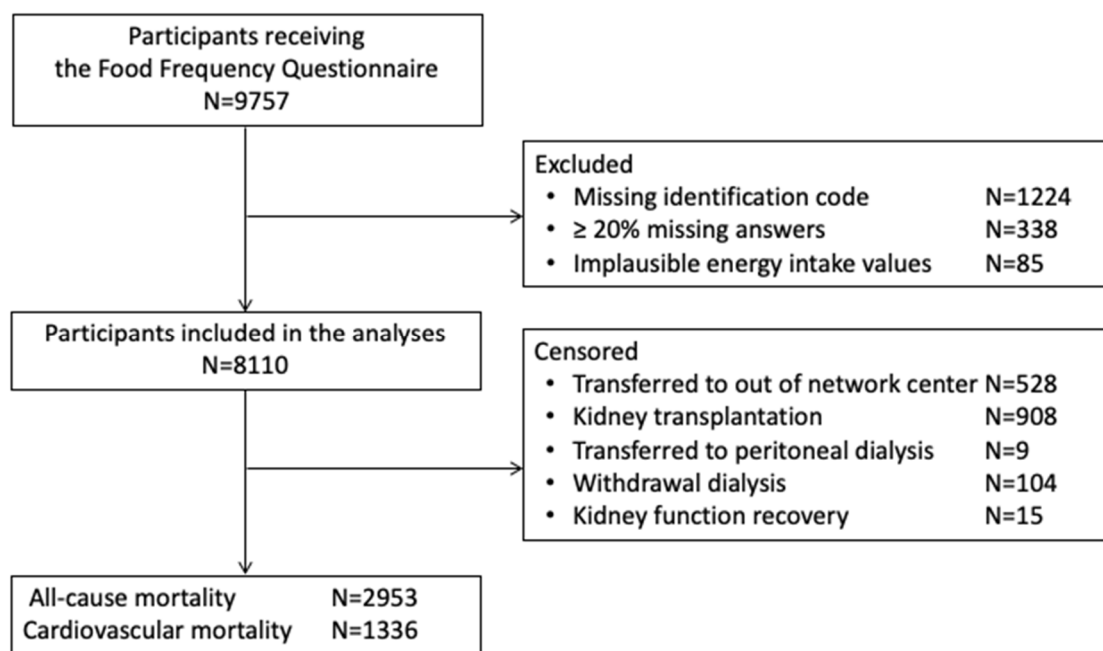

Supplementary Figure S1. Flowchart.

**Supplementary Table S1. Food items in each source-based phosphorus.**

| <b>Phosphorus source</b>                      | <b>Food items</b>                                                                                                                                                                                                                                                                                                                                                                                                                                                                                                                                                                                                                                                                                           |
|-----------------------------------------------|-------------------------------------------------------------------------------------------------------------------------------------------------------------------------------------------------------------------------------------------------------------------------------------------------------------------------------------------------------------------------------------------------------------------------------------------------------------------------------------------------------------------------------------------------------------------------------------------------------------------------------------------------------------------------------------------------------------|
| <b>Plant-based</b>                            |                                                                                                                                                                                                                                                                                                                                                                                                                                                                                                                                                                                                                                                                                                             |
| Bread                                         | Wholemeal or brown bread, white bread, rye bread, naan bread, chapatti, yeast based bread                                                                                                                                                                                                                                                                                                                                                                                                                                                                                                                                                                                                                   |
| Cereal                                        | All-bran cereals, cereal bars, wheat germ, Quaker (or other oat cereal) , Cornflakes                                                                                                                                                                                                                                                                                                                                                                                                                                                                                                                                                                                                                        |
| Couscous, paster or noodles                   | Couscous, plain (refined) pasta (e.g., spaghetti), plain wholemeal (unrefined) pasta, filled pasta (with meat/cheese/vegetables), noodles (excluding rice noodles)                                                                                                                                                                                                                                                                                                                                                                                                                                                                                                                                          |
| Rice                                          | White rice, brown/wholemeal (unrefined) rice, rice noodles                                                                                                                                                                                                                                                                                                                                                                                                                                                                                                                                                                                                                                                  |
| Nuts                                          | Peanuts, cashew nuts, almonds, walnuts                                                                                                                                                                                                                                                                                                                                                                                                                                                                                                                                                                                                                                                                      |
| Legumes                                       | Kidney (red), black beans, lentils, chickpeas (also hummus), cluster beans (guar), French beans, fava beans, soya beans                                                                                                                                                                                                                                                                                                                                                                                                                                                                                                                                                                                     |
| Vegetables                                    | Lettuce, spinach (including lamb's quarters), chard, fenugreek, wild greens (e.g., purslane, watercress), okra, tomato, aubergine, courgette, sweet peppers (e.g., red, green, yellow), cucumber, bitter melon (karela), carrots, parsnip, turnip or swede, artichokes, radish, beetroot, celery, coleslaw, sweet corn, asparagus, herbs (mint, fennel, chive, basil, dill, coriander, parsley), leek, white/other mushrooms, onion, garlic, cauliflower, pumpkin, Brussel sprouts, peas (green), broccoli, cabbage (white, green, red, savoy), stuffed vegetables (vine/green leaves with rice or meat), pickled vegetables (cucumber, radish, cabbage), ginger (in savoury and sweet dishes, in infusion) |
| Potato                                        | Potato, mashed potatoes, baked/roasted/casserole, chips/French fries, potato in salads, sweet potato, potato tortilla (omelette)                                                                                                                                                                                                                                                                                                                                                                                                                                                                                                                                                                            |
| Fruits                                        | Apple, pear, avocado, mango, apricot, nectarine, peach, plum, cherries, rhubarb, berries (e.g. blueberry, strawberry, blackcurrants, blackberry raspberry), banana, melon/ watermelon, grape, squeezed fresh fruit, pineapple, kiwi, lemon, orange, mandarin/tangerine, grapefruit, tinned fruits, raisin, sultana fig, prune olives (e.g. black, green), dates                                                                                                                                                                                                                                                                                                                                             |
| Soya, tofu                                    | Soy milk, yogurt from soy, tofu                                                                                                                                                                                                                                                                                                                                                                                                                                                                                                                                                                                                                                                                             |
| <b>Animal-based</b>                           |                                                                                                                                                                                                                                                                                                                                                                                                                                                                                                                                                                                                                                                                                                             |
| Red meat (beef, veal, lamb, pork, game, etc.) | Hot/cold roast beef, boiled beef, beef steak, fillet, loin beef burger (hamburger) minced, beef meat in stew, casserole, in curry<br><br>Pork cutlet, chop, steak, fillet, loin, pork ribs, mince, meat pies, sausages, veal<br>Small game (e.g., rabbit, goat, pheasant, duck), other game (e.g., deer, moose), lamb (e.g., in stews, kebabs), cured pork (cold or hot-cooked), jamon, ham (e.g., Serrano, prosciutto), dried cured sausages (chorizo, salchichon, salami), Frankfurters, bacon, bacon cubes, smoked lamb                                                                                                                                                                                  |

|                     |                                                                                                                                                                                                                                                                                                                                                                                                                                                                                                                                                                          |
|---------------------|--------------------------------------------------------------------------------------------------------------------------------------------------------------------------------------------------------------------------------------------------------------------------------------------------------------------------------------------------------------------------------------------------------------------------------------------------------------------------------------------------------------------------------------------------------------------------|
| Poultry, chicken    | Any poultry with skin, any poultry without skin, chicken (e.g., boiled, roasted, chicken burgers), chicken (e.g., stews or casserole), turkey (e.g., roasted, boiled, strips), any smoked/cured poultry                                                                                                                                                                                                                                                                                                                                                                  |
| Liver or offal      | Liver (e.g., panita), pates, potted meat, other offal (e.g., tongue, brain, heart, kidney, tripe)                                                                                                                                                                                                                                                                                                                                                                                                                                                                        |
| Fish, seafood       | Fresh fatty fish (e.g., salmon, tuna, trout, anchovy, herring, mackerel, sardine, Gravlax, eel), fresh white fish (e.g., hake/burbot, cod, haddock, plaice, whiting), other fresh fish/seafood products (e.g., taramasalata), fresh crustaceans and molluscs (e.g., mussel, crab, calamari, octopus, cuttlefish, cured or smoked fatty fish, tinned fish (sardine, tuna, or salmon), tinned crustaceans and molluscs (e.g., mussel, crab, calamari, octopus, cuttlefish, shrimp, clam, sardines, tuna, salmon, kipper), cured or smoked white fish (e.g., cod, Bacalhau) |
| Eggs                | Eggs (fried/poached/boiled/hard boiled/in sandwiches), egg-based savoury dishes, egg-based desserts (e.g., egg cakes, tarts, egg and nuts, sweets)                                                                                                                                                                                                                                                                                                                                                                                                                       |
| Milk                | Full-fat milk, semi-skimmed milk, skimmed milk, milk fortified with omega 3 fatty acids, yogurt (any type including fromage)                                                                                                                                                                                                                                                                                                                                                                                                                                             |
| Cheese              | Hard cheeses (e.g., Cheddar, Parmesan), soft cheeses (e.g., Brie, Camembert, Philadelphia, Tomini, Boursault, Brinza, Chaource, semi-hard cheeses (e.g., Gouda, Emmental/Edam), cottage cheese (cheese curd) (natural/with scents), fresh cheeses (e.g., Feta, Mozzarella)                                                                                                                                                                                                                                                                                               |
| Cream               | Ice cream, single cream, crème, crème fraîche, sour cream, double or clotted cream                                                                                                                                                                                                                                                                                                                                                                                                                                                                                       |
| Butter              | Low/reduced fat butter, normal butter, lard                                                                                                                                                                                                                                                                                                                                                                                                                                                                                                                              |
| <b>Others</b>       |                                                                                                                                                                                                                                                                                                                                                                                                                                                                                                                                                                          |
| Sauce or dressing   | Dressing sauces (e.g., French, Caesar, Thousand Island), mayonnaise, white sauce, ketchup, instant soup, pizza (any), Brown sauce                                                                                                                                                                                                                                                                                                                                                                                                                                        |
| Cakes or pastries   | Cakes (e.g., sponge, chocolate,) pastries (e.g., croissants), rolls (with/without stuffing), muffins, donuts, buns (plain or filled), rice pudding, cheese cake, pancakes, plain biscuits (with no fill or cream)                                                                                                                                                                                                                                                                                                                                                        |
| Jam                 | Jam, marmalade, honey                                                                                                                                                                                                                                                                                                                                                                                                                                                                                                                                                    |
| Sweets              | Boiled sweets, toffees, caramels, mixed candies, cereal bars, flapjacks/fruit bar, water ice (ice lolly)                                                                                                                                                                                                                                                                                                                                                                                                                                                                 |
| Chocolate           | Chocolate snack bars (e.g., Mars bar), dark chocolate, milk chocolate                                                                                                                                                                                                                                                                                                                                                                                                                                                                                                    |
| Margarine or spread | Low-fat margarine, blended spreads, soya-based margarine or spreads, any margarine or vegetable spreads fortified with omega-3                                                                                                                                                                                                                                                                                                                                                                                                                                           |
| Sweet drinks        | Carbonated/soft drinks with sugar, carbonated/soft drinks with artificial sweetener                                                                                                                                                                                                                                                                                                                                                                                                                                                                                      |
| Tea, beer, wine     | Black tea (any), coffee (instant or ground), Greek (Turkish) coffee, green tea, peppermint tea, other herbal infusions, beer (any), red wine, white wine, rose wine, fortified wines (liqueurs (e.g., sherry, port, Madeira)                                                                                                                                                                                                                                                                                                                                             |

**Supplementary Table S2. Association between total daily phosphorus intake and mortality.**

| Total daily phosphorus intake (mg/day)                     | Total | T1 (154-1100; median: 822) | T2 (1101-1747; median: 1388) | T3 (1748-8179; median: 2324) | P for trend | Every SD increase (896 mg/day) | P value |
|------------------------------------------------------------|-------|----------------------------|------------------------------|------------------------------|-------------|--------------------------------|---------|
| <b>All-cause mortality</b>                                 |       |                            |                              |                              |             |                                |         |
| Number of observations                                     | 8110  | 2704                       | 2703                         | 2703                         |             |                                |         |
| Number of events                                           | 2953  | 943                        | 986                          | 1024                         |             |                                |         |
| Event rate per 1000 person-year                            |       | 108                        | 114                          | 117                          |             |                                |         |
| Univariable                                                | 8110  | 1.00 (ref)                 | 1.03 (0.94–1.13)             | 1.03 (0.94–1.13)             | 0.49        | 0.98 (0.94–1.01)               | 0.23    |
| Multivariable                                              | 8110  | 1.00 (ref)                 | 1.08 (0.98–1.19)             | 1.22 (1.06–1.40)             | 0.004       | 1.16(1.06–1.26)                | 0.002   |
| Multivariable (adjusted for serum phosphorus additionally) | 8110  | 1.00 (ref)                 | 1.09 (0.98–1.20)             | 1.24 (1.08–1.42)             | 0.002       | 1.17 (1.07–1.28)               | 0.001   |
| Multivariable (adjusted for protein intake additionally)   | 8110  | 1.00 (ref)                 | 1.07 (0.97–1.18)             | 1.19 (1.03–1.37)             | 0.02        | 1.14 (1.02–1.26)               | 0.02    |
| Competing risk                                             | 8110  | 1.00 (ref)                 | 1.09 (0.99–1.20)             | 1.26 (1.05–1.41)             | 0.01        | 1.17(1.04–1.29)                | 0.01    |
| <b>Cardiovascular mortality</b>                            |       |                            |                              |                              |             |                                |         |
| Number of events                                           | 1160  | 363                        | 355                          | 442                          |             |                                |         |
| Event rate per 1000 person-year                            |       | 42                         | 41                           | 51                           |             |                                |         |
| Univariable                                                | 8110  | 1.00 (ref)                 | 1.01 (0.87–1.16)             | 1.05 (0.90–1.21)             | 0.54        | 1.00 (0.95–1.06)               | 0.91    |
| Multivariable                                              | 8110  | 1.00 (ref)                 | 1.03 (0.88–1.21)             | 1.15 (0.93–1.42)             | 0.21        | 1.18 (1.03–1.36)               | 0.01    |
| Multivariable (adjusted for serum phosphorus additionally) | 8110  | 1.00 (ref)                 | 1.03 (0.88–1.21)             | 1.18 (0.95–1.46)             | 0.14        | 1.20 (1.05–1.37)               | 0.009   |
| Multivariable (adjusted for protein intake additionally)   | 8110  | 1.00 (ref)                 | 1.03 (0.88–1.21)             | 1.16 (0.92–1.44)             | 0.22        | 1.25 (1.06–1.46)               | 0.006   |
| Competing risk                                             | 8110  | 1.00 (ref)                 | 1.01 (0.86–1.19)             | 1.14 (0.90–1.43)             | 0.32        | 1.27 (1.09–1.48)               | 0.002   |

Multivariable Cox proportional hazard regression analyses fitted using a random effects shared frailty model adjusted for age, sex, physical activity, smoking, body mass index, secondary education, serum albumin, serum haemoglobin, serum calcium, history of cardiovascular disease, diabetes, pulmonary disease, statins, dialysis vintage, vascular access type (fistula versus graft/catheter), Kt/V, energy intake per day, potassium intake gram per day, and Mediterranean diet score. Analysis of cardiovascular mortality was additionally adjusted for alcohol consumption and antihypertensive drugs

**Supplementary Table S3. Association between proportion of phosphorus intake from plant sources and mortality.**

| Proportion of phosphorus intake from plant (percentage)    | Total | T1 (0.8–28%; median: 23%) | T2 (29–42%; median: 35%) | T3 (43–99%; 56%) | P for trend | Every 1 SD increase (17%) | P value |
|------------------------------------------------------------|-------|---------------------------|--------------------------|------------------|-------------|---------------------------|---------|
| <b>All-cause mortality</b>                                 |       |                           |                          |                  |             |                           |         |
| Number of observations                                     | 8110  | 2704                      | 2703                     | 2703             |             |                           |         |
| Number of events                                           | 2953  | 1034                      | 992                      | 927              |             |                           |         |
| Event rate per 1000 person-year                            |       | 122                       | 114                      | 103              |             |                           |         |
| Univariable                                                | 8110  | 1.00 (ref)                | 0.98 (0.89–1.06)         | 0.92 (0.84–1.01) | 0.09        | 0.97 (0.93–1.01)          | 0.15    |
| Multivariable                                              | 8110  | 1.00 (ref)                | 0.96 (0.87–1.05)         | 0.89 (0.80–0.99) | 0.01        | 0.95 (0.90–0.99)          | 0.03    |
| Multivariable (adjusted for serum phosphorus additionally) | 8110  | 1.00 (ref)                | 0.95 (0.87–1.04)         | 0.88 (0.79–0.99) | 0.04        | 0.94 (0.90–0.98)          | 0.02    |
| Multivariable (adjusted for protein intake additionally)   | 8110  | 1.00 (ref)                | 0.95 (0.87–1.05)         | 0.89 (0.79–0.99) | 0.04        | 0.94 (0.89–0.99)          | 0.02    |
| Competing risk                                             | 8110  | 1.00 (ref)                | 0.95 (0.87–1.05)         | 0.88 (0.78–0.99) | 0.01        | 0.93 (0.88–0.98)          | 0.007   |
| <b>Cardiovascular mortality</b>                            |       |                           |                          |                  |             |                           |         |
| Number of events                                           | 1160  | 373                       | 353                      | 434              |             |                           |         |
| Event rate per 1000 person-year                            |       | 44                        | 41                       | 48               |             |                           |         |
| Univariable                                                | 8110  | 1.00 (ref)                | 0.92 (0.79–1.06)         | 0.98 (0.85–1.13) | 0.83        | 1.02 (0.96–1.08)          | 0.59    |
| Multivariable                                              | 8110  | 1.00 (ref)                | 0.88 (0.76–1.03)         | 0.94 (0.79–1.11) | 0.46        | 0.99 (0.92–1.06)          | 0.78    |
| Multivariable (adjusted for serum phosphorus additionally) | 8110  | 1.00 (ref)                | 0.88 (0.75–1.03)         | 0.93 (0.79–1.10) | 0.42        | 0.98 (0.92–1.05)          | 0.71    |
| Multivariable (adjusted for protein intake additionally)   | 8110  | 1.00 (ref)                | 0.88 (0.76–1.03)         | 0.86 (0.72–1.03) | 0.09        | 0.93 (0.85–1.00)          | 0.07    |

|                |       |            |                  |                  |      |                  |      |
|----------------|-------|------------|------------------|------------------|------|------------------|------|
| Competing risk | 8,110 | 1.00 (ref) | 0.89 (0.76–1.03) | 0.92 (0.78–1.09) | 0.41 | 0.96 (0.91–1.06) | 0.69 |
|----------------|-------|------------|------------------|------------------|------|------------------|------|

Multivariable Cox proportional hazard regression analyses fitted using a random effects shared frailty model adjusted for age, sex, physical activity, smoking, body mass index, secondary education, history of cardiovascular disease, hypertension, diabetes, pulmonary disease, cancer, serum haemoglobin, serum albumin, serum calcium, statins, phosphate-binders (any or none), vascular access type (fistula versus graft/catheter), dialysis vintage, Kt/V, total energy intake per day and potassium intake gram per day, and Mediterranean diet score (we included total daily phosphorus intake as covariate when investigating the association between proportion of phosphorus from specific sources and mortality). Analysis of cardiovascular mortality was additionally adjusted for alcohol consumption and antihypertensive drugs.



**Supplementary Table S4. Association between proportion of phosphorus intake from animal sources and mortality.**

| Proportion of phosphorus intake from animal source (percentage) | Total | T1 (0–45%; median: 34%) | T2 (46–61%; median: 55%) | T3 (62–99%; median: 70%) | P trend | for Every 1 SD increase (17%) | P value |
|-----------------------------------------------------------------|-------|-------------------------|--------------------------|--------------------------|---------|-------------------------------|---------|
| <b>All-cause mortality</b>                                      |       |                         |                          |                          |         |                               |         |
| Number of observations                                          | 8110  | 2704                    | 2703                     | 2703                     |         |                               |         |
| Number of events                                                | 2953  | 981                     | 972                      | 1000                     |         |                               |         |
| Event rate per 1000 person-year                                 |       | 110                     | 113                      | 117                      |         |                               |         |
| Univariable random effect                                       | 8110  | 1.00 (ref)              | 1.03 (0.94–1.12)         | 1.06 (0.97–1.17)         | 0.21    | 1.03 (1.00–1.07)              | 0.08    |
| Multivariable random effect                                     | 8110  | 1.00 (ref)              | 1.01 (0.91–1.12)         | 0.96 (0.85–1.09)         | 0.54    | 1.01 (0.96–1.05)              | 0.46    |
| Multivariable random effect (adjusted for serum phosphorus)     | 8110  | 1.00 (ref)              | 1.02 (0.91–1.12)         | 1.00 (0.88–1.13)         | 0.61    | 1.02 (0.97–1.07)              | 0.45    |
| Multivariable (adjusted for protein intake additionally)        | 8110  | 1.00 (ref)              | 1.01 (0.91–1.11)         | 0.96 (0.85–1.09)         | 0.53    | 1.02 (0.96–1.07)              | 0.58    |
| Competing risk                                                  | 8110  | 1.00 (ref)              | 1.03 (0.90–1.13)         | 1.01 (0.89–1.14)         | 0.51    | 1.01 (0.95–1.06)              | 0.46    |
| <b>Cardiovascular mortality</b>                                 |       |                         |                          |                          |         |                               |         |
| Number of events                                                | 1160  | 459                     | 366                      | 335                      |         |                               |         |
| Event rate per 1000 person-year                                 |       | 51                      | 42                       | 39                       |         |                               |         |
| Univariable random effect                                       | 8110  | 1.00 (ref)              | 0.96 (0.83–1.10)         | 0.99 (0.85–1.15)         | 0.87    | 1.01 (0.94–1.07)              | 0.86    |
| Multivariable random effect                                     | 8110  | 1.00 (ref)              | 0.94 (0.81–1.09)         | 0.92 (0.78–1.09)         | 0.35    | 0.99 (0.93–1.06)              | 0.79    |
| Multivariable random effect (adjusted for serum phosphorus)     | 8110  | 1.00 (ref)              | 0.94 (0.81–1.09)         | 0.93 (0.78–1.10)         | 0.37    | 0.99 (0.93–1.06)              | 0.83    |
| Multivariable (adjusted for protein intake additionally)        | 8110  | 1 (Ref)                 | 1.02 (0.86–1.20)         | 1.00 (0.82–1.21)         | 0.99    | 1.07 (0.97–1.16)              | 0.17    |

|                |      |            |                  |                  |      |                  |      |
|----------------|------|------------|------------------|------------------|------|------------------|------|
| Competing risk | 8110 | 1.00 (ref) | 0.93 (0.80–1.08) | 0.94 (0.78–1.11) | 0.39 | 1.00 (0.94–1.07) | 0.85 |
|----------------|------|------------|------------------|------------------|------|------------------|------|

Multivariable Cox proportional hazard regression analyses fitted using a random effects shared frailty model adjusted for age, sex, physical activity, smoking, body mass index, secondary education, history of cardiovascular disease, hypertension, diabetes, pulmonary disease, cancer, serum haemoglobin, serum albumin, serum calcium, statins, phosphate-binders (any or none), vascular access type (fistula versus graft/catheter), dialysis vintage, Kt/V, total energy intake per day and potassium intake gram per day, and Mediterranean diet score (we included total daily phosphorus intake as covariate when investigating the association between proportion of phosphorus from specific sources and mortality). Analysis of cardiovascular mortality was additionally adjusted for alcohol consumption and antihypertensive drugs.

**Supplementary Table S5. Association between the proportion of phosphorus intake from other sources and mortality.**

| Proportion of phosphorus intake from other source<br>(percentage) | Total | T1 (0–3%;<br>median: 2%) | T2 (4–8%;<br>median: 6%) | T3 (9–88%; median:<br>14%) | P for<br>trend | Every 1<br>increase (9%) | SD P<br>value |
|-------------------------------------------------------------------|-------|--------------------------|--------------------------|----------------------------|----------------|--------------------------|---------------|
| <b>All-cause mortality</b>                                        |       |                          |                          |                            |                |                          |               |
| Number of observations                                            | 8110  | 2704                     | 2703                     | 2703                       |                |                          |               |
| Number of events                                                  | 2953  | 994                      | 941                      | 1018                       |                |                          |               |
| Event rate per 1000 person-year                                   |       | 115                      | 106                      | 118                        |                |                          |               |
| Univariable                                                       | 8110  | 1.00 (ref)               | 0.83 (0.76–0.90)         | 0.86 (0.78–0.94)           | <0.01          | 0.99 (0.95–1.02)         | 0.58          |
| Multivariable                                                     | 8110  | 1.00 (ref)               | 0.99 (0.90–1.08)         | 1.12 (1.01–1.24)           | 0.03           | 1.06 (1.02–1.10)         | 0.006         |
| Multivariable (adjusted for serum phosphorus<br>additionally)     | 8110  | 1.00 (ref)               | 0.99 (0.90–1.08)         | 1.12 (1.01–1.25)           | 0.004          | 1.06 (1.02–1.10)         | 0.004         |
| Multivariable (adjusted for protein intake additionally)          | 8110  | 1.00 (ref)               | 0.99 (0.89–1.08)         | 1.13 (1.02–1.25)           | 0.03           | 1.06 (1.02–1.10)         | 0.003         |
| Competing risk                                                    | 8110  | 1.00 (ref)               | 0.99 (0.91–1.08)         | 1.11 (1.01–1.23)           | 0.003          | 1.07 (1.03–1.11)         | 0.005         |
| <b>Cardiovascular mortality</b>                                   |       |                          |                          |                            |                |                          |               |
| Number of events                                                  | 1160  | 380                      | 366                      | 414                        |                |                          |               |
| Event rate per 1000 person-year                                   |       | 44                       | 41                       | 48                         |                |                          |               |
| Univariable                                                       | 8110  | 1.00 (ref)               | 0.81 (0.70–0.94)         | 0.81 (0.69–0.94)           | <0.01          | 0.96 (0.90–1.01)         | 0.17          |
| Multivariable                                                     | 8110  | 1.00 (ref)               | 0.96 (0.83–1.11)         | 1.05 (0.90–1.24)           | 0.52           | 1.03 (0.96–1.09)         | 0.35          |
| Multivariable (adjusted for serum phosphorus<br>additionally)     | 8110  | 1.00 (ref)               | 0.96 (0.83–1.12)         | 1.06 (0.90–1.25)           | 0.48           | 1.04 (0.97–1.10)         | 0.29          |
| Multivariable (adjusted for protein intake additionally)          | 8110  | 1.00 (ref)               | 0.98 (0.85–1.15)         | 1.08 (0.92–1.28)           | 0.35           | 1.03 (0.96–1.09)         | 0.45          |
| Competing risk                                                    | 8110  | 1.00 (ref)               | 1.00 (0.86–1.16)         | 1.09 (0.92–1.30)           | 0.31           | 1.04 (0.95–1.11)         | 0.38          |

Multivariable Cox proportional hazard regression analyses fitted using a random effects shared frailty model adjusted for age, sex, physical activity, smoking, body mass index, secondary education, history of cardiovascular disease, hypertension, diabetes, pulmonary disease, cancer, serum haemoglobin, serum

albumin, serum calcium, statins, phosphate-binders (any or none), vascular access type (fistula versus graft/catheter), dialysis vintage, Kt/V, total energy intake per day and potassium intake gram per day, and Mediterranean diet score (we included total daily phosphorus intake as covariate when investigating the association between proportion of phosphorus from specific sources and mortality). Analysis of cardiovascular mortality was additionally adjusted for alcohol consumption and antihypertensive drugs.

### **Supplementary Item S1. Variables and methods used in the multiple imputation.**

In this subset population, most covariates had fewer than 5% missing data, except for serum albumin (24%), educational level (25%), smoking (23%), physical activity (24%), and statin (23%). Data were assumed to be missing at random and 30 datasets were input using multiple imputation chained equation. We used linear regression for the input of continuous variables as no covariates with missing data had a skewed distribution. For categorical variables, the input was conducted by logistic regression (binary) or ordinal logistic regression (ordinal categorical with more than two levels). All covariates with missing values used in the multivariable analysis were included in the imputation models. Daily phosphorus intake, age, sex, dialysis vintage, comorbidities (history of cardiovascular disease, history of cardiovascular disease, hypertension, diabetes, pulmonary disease, gastrointestinal disease, cancer, liver disease), antihypertensive medication, statin, phosphate binders(any or none), total energy intake (1000 kcal/day), weight change in 3 months prior, normalised protein catabolic rate, country, time at risk of death, and Nelson–Aalen estimator for outcome of interest (all-cause mortality or cardiovascular mortality) were included as auxiliary variables.

**Supplementary Item S2. List of clinicians and health care professionals at the participating centres in the DIET-HD Study.**

Argentina: R Gelfman, E Celia, A Badino, L Petracci, C Villareal, M Soto, M Arias, F Vera, V Quispe, S Morales, D Bueno, R Bargna, G Peñaloza, L Alcalde, J Dayer, A Milán, N Centurión, A Ramos, E De Orta, S Menardi, N Austa Bel, E Marileo, N Junqueras, C Favalli, R Trioni, G Valle, M López, C Marinaro, A Fernandez, J Corral, E Nattiello, S Marone, J García, G Carrizo, P González, O Delicia, M Maza, M Chauque, J Mora, D Grbavac, L López, M Alonso, C Villalba, M Simon, M Cernadas, C Moscatelli, I Vilamajó, C Tursky, M Martínez, F Villalba, D Pereira, S Araujo, H López, V Alonso, B Vázquez, M Rapetti, S Raña, M Capdevila, C Ljubich, M Acosta, M Coombes, V Doria, M Ávila, D Cáceres, E Geandet, C Romero, E Morales, C Recalde, S Marone, M Casanú, B Lococo, O Da Cruz, C Focsaner, D Galarce, L Albarracín, E Vescovo, M Gravielle, D Florio, L Baumgart, M Corbalán, V Aguilera, O Hermida, C Galli, L Ziombra, A Gutierrez, S Frydelund, A Hardaman, A Maciel, M Arrigo, C Mato Mira, J Leibovich, R Paparone, E Muller, A Malimar, I Leocadio, W Cruz, S Tirado, A Peñalba, R Cejas, S Mansilla, C Campos, E Abrego, P Chávez, G Corpacci, A Echavarría, C Engler, P Vergara, M Hubeli, G Redondo, B Noroña;

France: P Stroumza, C Boriceanu, M Lankester, JL Poignet, Y Saingra, M Indreies, J Santini, Mahi A, A Robert, P Bouvier, T Merzouk, F Villemain, A Pajot, F Tollis, M Brahim-Bounab, A Benmoussa, S Albitar, MC Guimont, P Ciobotaru, A Guerin, M Diaconita; Germany: M Hansis, SH Hoischen, J Saupe, I Ullmann S Grosser, J Kunow, S Grueger, D Bischoff, J Benders, P Worch, T Pfab, N Kamin, M Roesch, M May;

Hungary: M Török, K Albert, I Csaszar, E Kiss, D Kosa, A Orosz, J Redl, L Kovacs, E Varga, M Szabo, K Magyar, E Zajko, A Bereczki, J Csikos, E Kerekes, A Mike, K Steiner, E Nemeth, K Tolnai, A Toth, J Vinczene, Sz Szummer, E Tanyi, M Szilvia;

Italy: L Gargano, AM Murgo, N Sanfilippo, N Dambrosio, C Saturno, G Matera, M Benevento, V Greco, G di Leo, S Papagni, F Alicino, A Marangelli, F Pedone, AV Cagnazzo, R Antinoro, ML Sambati, C Donatelli, F Ranieri, F Torsello, P Steri, C Riccardi, A Flammini, L Moscardelli, E Boccia, M Mantuano, R Di Toro Mammarella, M Meconizzi, R Fichera, A D'Angelo, G Latassa, A Molino, M Fici, A Lupo, G Montalto, S Messina, C Capostagno, G Randazzo, S Pagano, G

Marino, D Rallo, A Maniscalco, OM Trovato, C Strano, A Failla, A Bua, S Campo, P Nasisi, A Salerno, S Laudani, F Grippaldi, D Bertino, DV Di Benedetto, A Puglisi, S Chiarenza, M Lentini Deuscit, CM Incardona, G Scuto, C Todaro, A Dino, D Novello, A Coco;

Poland: AB Skublewsk, J Duława, E Bocheńska-Nowacka, A Jaroszyński, J Drabik, M Wypych-Birecka, D Daniewska, M Drobisz, K Doskocz, G Wyrwicz-Zielińska, A Kosicki, W Ślizień, P Rutkowski, S Arentowicz, S Dzimira, M Grabowska, J Ostrowski, A Całka, T Grzegorzczak, W Dżugan, M Mazur, M Myśliński, M Piechowska, D Kozicka;

Portugal: V de Sá Martins, L Aguiar, AR Mira, B Velez, T Pinheiro;

Romania: D Timofte, E Agapi, CL Ardelean, A Baidog, G Bako, M Barb, A Blaga, E Bodurian, V Bumbea, E Dragan, D Dumitrache, L Florescu, N Havasi, S Hint, R Ilies, AGM Mandita, RI Marian, SL Medrihan, L Mitea, S Mitea, R Mocanu, DC Moro, M Nitu, ML Popa, M Popa, E Railean, AR Scuturdean, K Szentendrey, CL Teodoru, A Varga;

Spain: AG Bernat, D Del Castillo, M García, M Olaya, V Abujder, J Carreras, A López, F Ros, G Cuesta, A García, E Orero, E Ros, S Bea, JL Pizarro, S Luengo, A Romero, M Navarro, L Cermeño, A Rodriguez, D Lopez, A Barrera, F Montoya, J Tajahuerce, M Carro, MQ Cunill, S Narci, T Ballester, MJ Soler, S Traver, PP Buta, L Cucuiat, L Rosu, I Garcia, CM Gavra, R Gonzalez, S Filimon, M Peñalver, V Benages, MI Cardo, E García, P Soler, E Fernandez, F Popescu, R Munteanu, E Tanase, F Sagau, D Prades, S Esteller, E Gonzalez, R Martinez, A Diago, J Torres, E Perez, C Garcia, I Lluch, J Forcano, M Fóns, A Rodríguez, NA Millán, J Fernández, B Ferreira, M Otero, V Pesqueira, S Abal, R Álvarez, C Jorge, I Rico, J de Dios Ramiro, L Duzy, A Soto, JL Lopez, Y Diaz, I Herrero, M Farré, C Blasco, S Ferrás, MJ Agost, C Miracle, J Farto;

Sweden: E Fabricius, J Goch, KS Katzarski, A Wulcan, C Wollheim, J Hegbrant;

Turkey: T Ecder, H Akbiber, H Arslan, L Bicen, A Buyukkiraz, R Celik, I'S Dogan, S Erkalkan, A Ertas, U Hark, E Iravul, M Karakaya, K Mengü, S Ongun, Z Ozkan, A Ozlu, N Ozveren, HM Sifil, N Sonmez Turksoz, Z Yilmaz.
